# Supplementary material
Source: PubMed Central journal article supplement (PMC6952055)
Supplement: jnm174169SupplementaryData.pdf [file jnm174169SupplementaryData.pdf]

## SUPPLEMENTARY MATERIAL

### Questionnaire: International survey on PET/MRI applications

1. In which area/region is your center located?
  - a) Western Europe
  - b) Asia
  - c) North America
  - d) Australia
  - e) Eastern Europe
  
2. Since when do you operate a combined PET/MRI?  
DD/MM/YYYY
  
3. Please name the vendor of your PET/MRI?
  - a) Siemens
  - b) GE
  - c) Philips
  
4. Describe the site of the PET/MRI installation.
  - a) Public – academic
  - b) Private – academic
  - c) Public – non-academic
  - d) Private – non-academic
  
5. How was the PET/MRI system funded?
  - a) Research funds/Grants
  - b) Government funding
  - c) Hospital funding
  - d) Private funding/donation
  
6. Which department is the PET/MRI installed at?
  - a) Nuclear Medicine
  - b) Radiology
  - c) Joint Nuc/Rad
  - d) Other (specify)
  
7. Who is the main operator of the PET/MRI?
  - a) Nuclear Medicine
  - b) Radiology
  - c) Joint Nuc/Rad
  - d) Other (specify)
  
8. How many MDs, techs, physicists, staff are engaged in routine operations?
  - a) MDs? (0-99)
  - b) Technicians? (0-99)
  - c) Physicists? (0-99)
  - d) Staff? (0-99)
  
9. Who reports the PET/MRI?
  - a) Nuclear Medicine expert

- b) Radiologist
  - c) Joint Nuc/Rad
  - d) Other (specify)
10. What fraction (%) of the PET/MRI is used clinically or for research?
- a) Clinical (0-100)
  - b) Research (0-100)
11. Please name the most prevalent research application
- a) Oncology
  - b) Other
  - c) Neurology
  - d) Cardiology
12. How many patients have been scanned on the PET/MRI since it was installed?  
(0-9999)
13. What is your average weekly throughput of PET/MRI patients?  
(0-999)
14. In addition to PET/MRI, do you run MR-only scans on separate patients using the PET/MRI?
- a) Yes / Fraction (%) of all patients on PET/MRI?
  - b) No
15. What fraction (%) of clinical PET/MRI patients is scheduled for neuro, cardio, onco, other scans?
- a) Neurology (0-100)
  - b) Cardiology (0-100)
  - c) Oncology (0-100)
  - d) Other (0-100)
16. Please list your PET/MRI study types/ indication ranked by frequency from the following selection (top 5):
- a) Cancer - Musculoskeletal
  - b) Cancer - Respiratory system
  - c) Cancer - Gastrointestinal
  - d) Cancer - Brain tumor
  - e) Cancer - Prostate Cancer
  - f) Cancer - Primary and secondary liver
  - g) Cancer - Pancreatic
  - h) Cancer - Head/neck
  - i) Cancer - Gynecologic
  - j) Cancer - Hematological
  - k) Neurodegenerative diseases
  - l) Cardiovascular disease
  - m) Orthopedics
  - n) Inflammation
  - o) Other
17. What is a typical neuro protocol and how long does it take?
- a) Time (0-999 minutes)

- b) Protocol? Free Field
18. What is a typical cardio protocol and how long does it take?
- a) Time (0-999 minutes)
  - b) Protocol? Free Field
19. What is a typical onco protocol and how long does it take?
- a) Time (0-999 minutes)
  - b) Protocol? Free Field
20. What is a typical "other" protocol and how long does it take?
- a) Time (0-999 minutes)
  - b) Protocol? Free Field
21. Please rate the three most popular tracers used for PET/MRI in neuro, cardio, onco, other?
- a) Neurology: FDG/FET/FDOPA/MET/PIB or Amyloid/Other
  - b) Cardiology: FDG/NH3/H2O/Rb/Other
  - c) Oncology: FDG/DOA/DOPA/PSMA/Choline/Other
  - d) Other: FDG/Other
22. If you would not have access to a PET/MRI what kind of imaging test would the majority of patients undergo instead?
- a) PET/CT
  - b) MRI and PET/CT
  - c) Other
23. What would you say is the key application of PET/MRI?
- Free Field
24. What runner-up applications do you see in the next 3 years?
- Free Field
25. Will PET/MRI excel in clinical routine over the next 1, 3, 5, 10 years?
- a) 1 year: yes / no
  - b) 3 years: yes / no
  - c) 5 years: yes / no
  - d) 10 years: yes / no
26. What will drive clinical adoption of PET/MRI?
- a) Cost
  - b) Unique clinical information
  - c) Patient throughput
  - d) Diagnostic superiority over PET/CT
  - e) Functional MRI capability combined with molecular PET information

**Supplemental Table 1: Uncensored free text response for MRI protocols (Questions 18-20).**

**Cardiology**

---

- 1 4 Chamber Cine, LVOT Cine, SA Cine, Pre Con Moll, T2 3 pt 3 recovery, TFI single shot 10 s, FLASH, T1 sat, TFL T1 Sag, T1 VIBE COR

**Neurology**

---

- 1 PET/MRI BRAIN WITH UTE AC, AXIAL T1, T2, FLAIR, DWI, SWI
- 2 T2 tra, T1 GRE 3D sag, DWI tra, FLAIR tra, T1 GRE 3D sag with contrast media
- 3 MPRAGE, PRE+POST, T1 COR, FLAIR, SWI, DWI
- 4 T2 TIRM tra, T2 TSE tra, Diff, T1 fl2d tra, sag, T1 SPC sag iso, T2 SPC sag iso
- 5 Sag T1, Ax T2, Ax FLAIR, AX DWI, Cor T2
- 6 Loc, AC, T2 FLAIR tra, T1 FLASH tra, T2 TSE tra/cor, SWI tra, T1 MPRAGE
- 7 t1-t2-flair-dwi

**Oncology**

---

- 1 PET/MRI WITH DIXON AC, AXIAL T1 VIBE DIXON, T2 HASTE, CORONAL STIR
  - 2 Dixon with and without contrast, DWI
  - 3 T2 HASTE, T1 VIBE
  - 4 DCE MRI
  - 5 DIXON for AC, T2-HASTE tra, T2-TIRM cor, Diff tra b 50-400-800, T2-VIBE without and with Gadolinium
  - 6 dixon-dwi-haste
  - 7 WB dixon, t2, DWI + locals
  - 8 Basic whole body or advanced with dedicated MR in specific body areas
-
